# Supplementary material
Source: Springer Nature journal article supplement (https://www.springermedizin.de/resource/supplementary/12913_2013_3205_MOESM2_ESM.pdf/9532690)
Supplement: MOESM2 [file 9532690]

Additional file 2

Means of common items per hospital at different survey time points

| Item                                                                                                    | Hospital | Baseline m(ci)  | 6 months m(ci)  | 18 months m(ci) |
|---------------------------------------------------------------------------------------------------------|----------|-----------------|-----------------|-----------------|
| Water from taps to wash your hands between patients                                                     | H1       | 2.43(1.62-3.23) | 6.83(5.86-7.81) | 6.31(5.31-7.31) |
|                                                                                                         | H2       | 6.52(5.43-7.61) | 7.49(6.58-8.4)  | 7.88(7.15-8.61) |
|                                                                                                         | H3       | 2.93(2.17-3.69) | 2.97(2.01-3.93) | 5.19(4.16-6.22) |
|                                                                                                         | H4       | 4(3.25-4.75)    | 5.02(4.2-5.84)  | 5.15(4.27-6.03) |
|                                                                                                         | H5       | 6.34(5.71-6.97) | 5.75(4.79-6.71) | 6.22(5.49-6.95) |
|                                                                                                         | H6       | 7.9(7.34-8.45)  | 8.6(8.05-9.15)  | 8.12(7.14-9.09) |
|                                                                                                         | H7       | 3.84(2.91-4.77) | 6.1(5.23-6.96)  | 6.31(5.24-7.37) |
|                                                                                                         | H8       | 8.92(8.38-9.45) | 8.42(7.81-9.03) | 8.24(7.66-8.82) |
| Soap / disinfectant to clean your hands between patients                                                | H1       | 5.28(4.18-6.37) | 6.52(5.47-7.57) | 6.25(5.17-7.33) |
|                                                                                                         | H2       | 6.06(4.89-7.23) | 6.95(5.92-7.98) | 7.68(6.84-8.52) |
|                                                                                                         | H3       | 3.65(2.64-4.65) | 3.89(2.74-5.03) | 6.22(5.22-7.22) |
|                                                                                                         | H4       | 4.74(3.77-5.71) | 4.06(3.04-5.09) | 6.61(5.66-7.56) |
|                                                                                                         | H5       | 4.54(3.61-5.48) | 6.68(5.6-7.76)  | 4.68(3.77-5.59) |
|                                                                                                         | H6       | 6.64(5.79-7.48) | 6.92(5.97-7.87) | 6.44(5.28-7.61) |
|                                                                                                         | H7       | 7.84(6.9-8.78)  | 8.26(7.4-9.13)  | 7.92(7.03-8.8)  |
|                                                                                                         | H8       | 9.22(8.66-9.79) | 8.54(7.75-9.33) | 8.37(7.68-9.06) |
| Availability of oxygen when needed                                                                      | H1       | 3.33(2.17-4.48) | 4.54(3.07-6.01) | 7.79(6.94-8.63) |
|                                                                                                         | H2       | 5.37(4.07-6.67) | 9(8.42-9.57)    | 8.65(7.95-9.34) |
|                                                                                                         | H3       | 5.51(4.48-6.55) | 5.55(4.26-6.83) | 6.61(5.3-7.91)  |
|                                                                                                         | H4       | 4.38(3.3-5.46)  | 7.35(6.33-8.36) | 7.12(6.03-8.21) |
|                                                                                                         | H5       | 3.57(2.41-4.74) | 4.03(2.57-5.49) | 3.91(2.73-5.1)  |
|                                                                                                         | H6       | 3.95(2.71-5.2)  | 5.87(4.61-7.12) | 7.2(5.79-8.61)  |
|                                                                                                         | H7       | 3(1.91-4.09)    | 6.57(5.34-7.81) | 4.56(3.26-5.87) |
|                                                                                                         | H8       | 6.02(4.59-7.45) | 6.27(4.94-7.6)  | 6.75(6.75-6.75) |
| Ability to provide oxygen at a flow of 2l/min(for PW and MCH) or 1l/min(NN) to each individual patient  | H1       | 1.38(0.55-2.2)  | 2.95(1.62-4.28) | 6.88(5.79-7.96) |
|                                                                                                         | H2       | 4.31(3.02-5.59) | 8.29(7.59-8.98) | 7.53(6.6-8.46)  |
|                                                                                                         | H3       | 3.16(2.31-4)    | 3.25(2.12-4.38) | 4.93(3.58-6.29) |
|                                                                                                         | H4       | 3.65(2.47-4.83) | 5.08(3.84-6.32) | 6.2(5.07-7.34)  |
|                                                                                                         | H5       | 2.32(1.34-3.3)  | 2.43(1.1-3.76)  | 3.13(2.02-4.24) |
|                                                                                                         | H6       | 2.31(1.15-3.48) | 4.16(2.91-5.41) | 5.25(3.32-7.18) |
|                                                                                                         | H7       | 1.68(0.74-2.61) | 5.16(3.82-6.5)  | 3.54(2.37-4.72) |
|                                                                                                         | H8       | 1.27(0.36-2.17) | 4.28(2.95-5.6)  | 5.1(3.95-6.25)  |
| Bolus glucose – number of times drug is immediately available to treat hypoglycaemia (within 2 minutes) | H1       | 3.67(2.68-4.67) | 7.61(6.53-8.68) | 8.76(8.13-9.4)  |
|                                                                                                         | H2       | 7.66(6.82-8.5)  | 9.01(8.35-9.67) | 9.23(8.68-9.79) |
|                                                                                                         | H3       | 5.07(4.2-5.93)  | 7.45(6.5-8.41)  | 8.07(7.25-8.9)  |
|                                                                                                         | H4       | 6.83(5.91-7.76) | 8.33(7.54-9.11) | 8.13(7.13-9.14) |
|                                                                                                         | H5       | 5.68(4.65-6.71) | 7.41(6.39-8.43) | 8.14(7.25-9.03) |
|                                                                                                         | H6       | 7.93(6.97-8.88) | 9.33(8.84-9.81) | 8.57(7.67-9.47) |
|                                                                                                         | H7       | 6.28(4.91-7.65) | 8.37(7.57-9.16) | 8.5(7.62-9.38)  |
|                                                                                                         | H8       | 9.28(8.62-9.95) | 9.07(8.42-9.72) | 8.44(7.58-9.29) |
